# Supplementary material for: Ultra-sensitive detection of kanamycin for food safety using a reduced graphene oxide-based fluorescent aptasensor
Source: PubMed Central journal article supplement (PMC5215691; doi:10.1038/srep40305), 2017-01-05
Supplement: srep40305-s1.pdf [file srep40305-s1.pdf]

1 **Supplementary Information**

2  
3 **Ultra-sensitive detection of kanamycin for food safety**

4 **using a reduced graphene oxide-based fluorescent aptasensor**

5  
6 Na-Reum Ha<sup>a</sup>, In-Pil Jung<sup>a</sup>, Im-Joung La<sup>b</sup>, Ho-Sup Jung<sup>c</sup>, Moon-Young Yoon<sup>a, \*</sup>

7 *<sup>a</sup> Department of Chemistry and Research Institute of Natural Sciences, Hanyang University,*  
8 *Seoul 04763, Republic of Korea*

9 *<sup>b</sup> Food Safety Center, Lotte Confectionery Co., Ltd., Seoul 07207, Republic of Korea*

10 *<sup>c</sup> Institute of Advanced Machinery and Design, Department of Mechanical and Aerospace*  
11 *Engineering, Seoul National University, Seoul 08826, Republic of Korea*

12  
13  
14  
15  
16  
17 \* Corresponding author:

18 Tel.: +82-2-2220-0946

19 Fax: +82-2-2298-0319

20 Address: *Department of Chemistry and Research institute of Natural Sciences, Hanyang*  
21 *University, 222 Wangsimni-ro, Seongdong-gu, Seoul 04763, Republic of Korea*

22 E-mail address: [myyoon@hanyang.ac.kr](mailto:myyoon@hanyang.ac.kr) (M. Y. Yoon).

23 **Supplementary Figures**

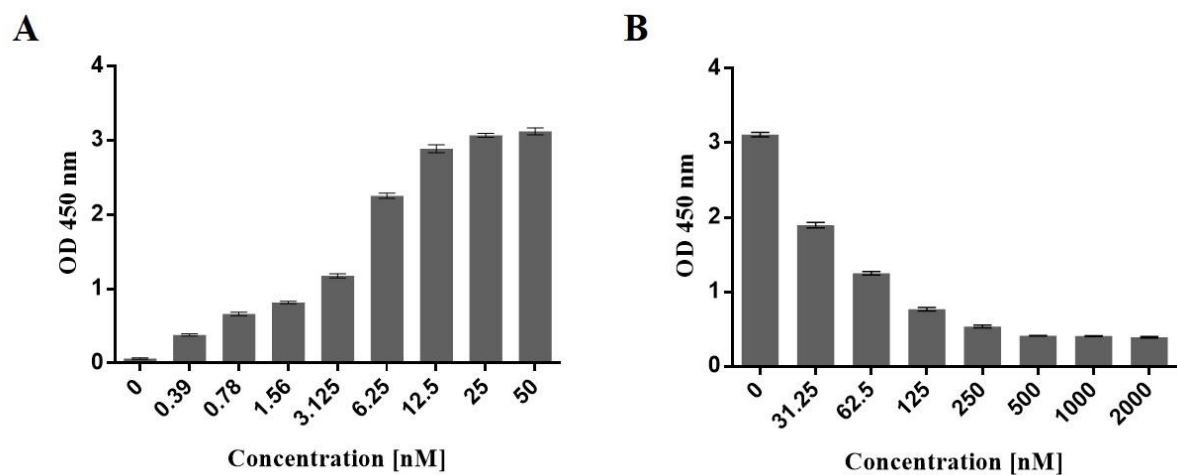

24

25 **Figure S1.** Determination of saturation concentrations for the signal detection DNA probe and  
26 kanamycin for DNA aptamer screening. (A) Optimization of the saturation point of the signal  
27 detection DNA probe (5'Biotin – TTTTTT-C<sub>6</sub>-NH<sub>2</sub>3'). (B) Immobilization of kanamycin on  
28 an NOS-coated DNA-BIND 96-well plate.

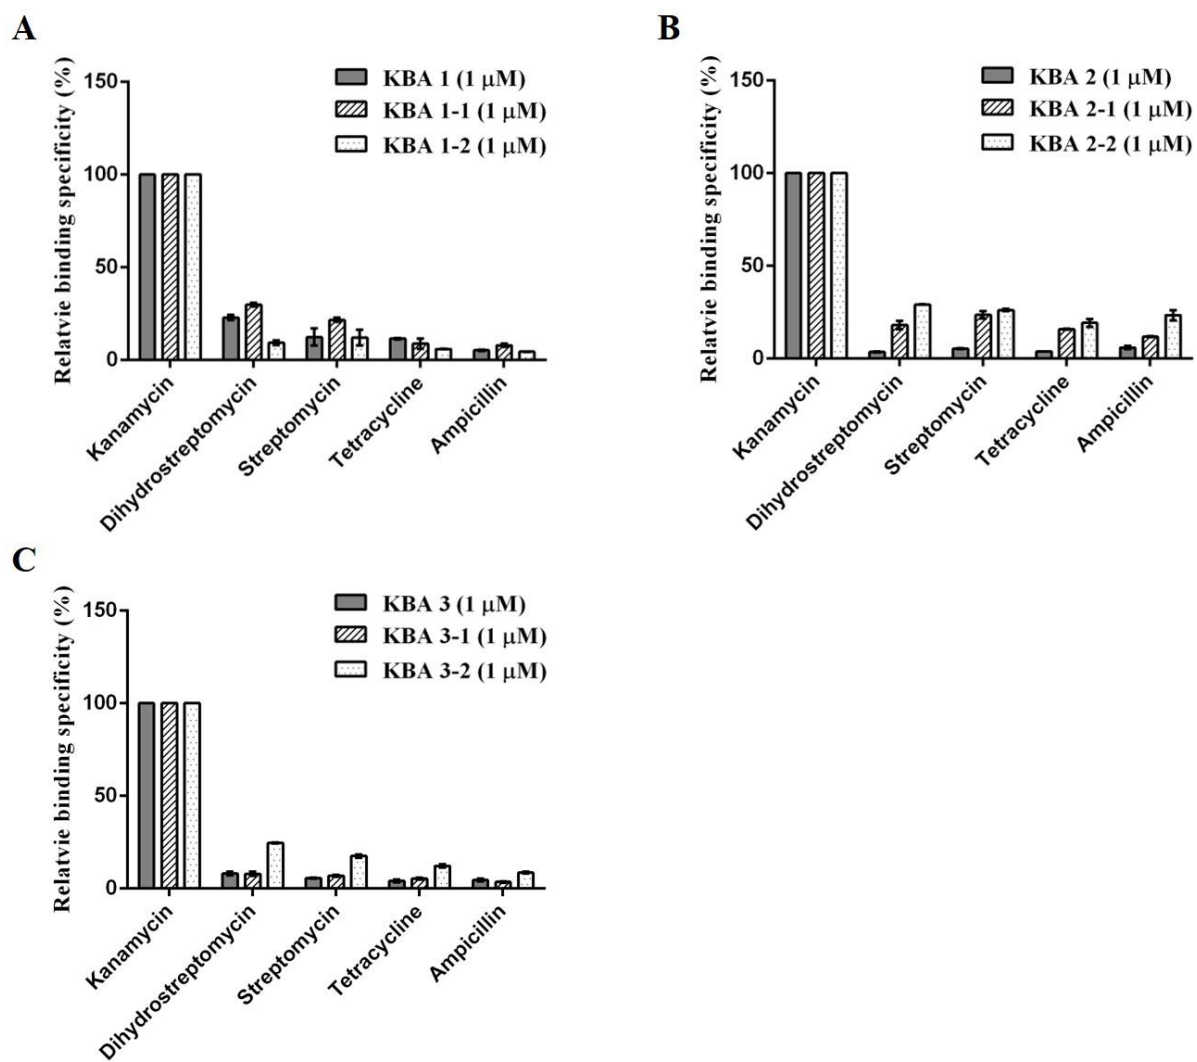

29

30 **Figure S2.** Antibiotic binding specificity of KBA derivatives: (A) KBA 1, (B) KBA 2, and (C)  
 31 KBA 3 (1 μM, respectively).

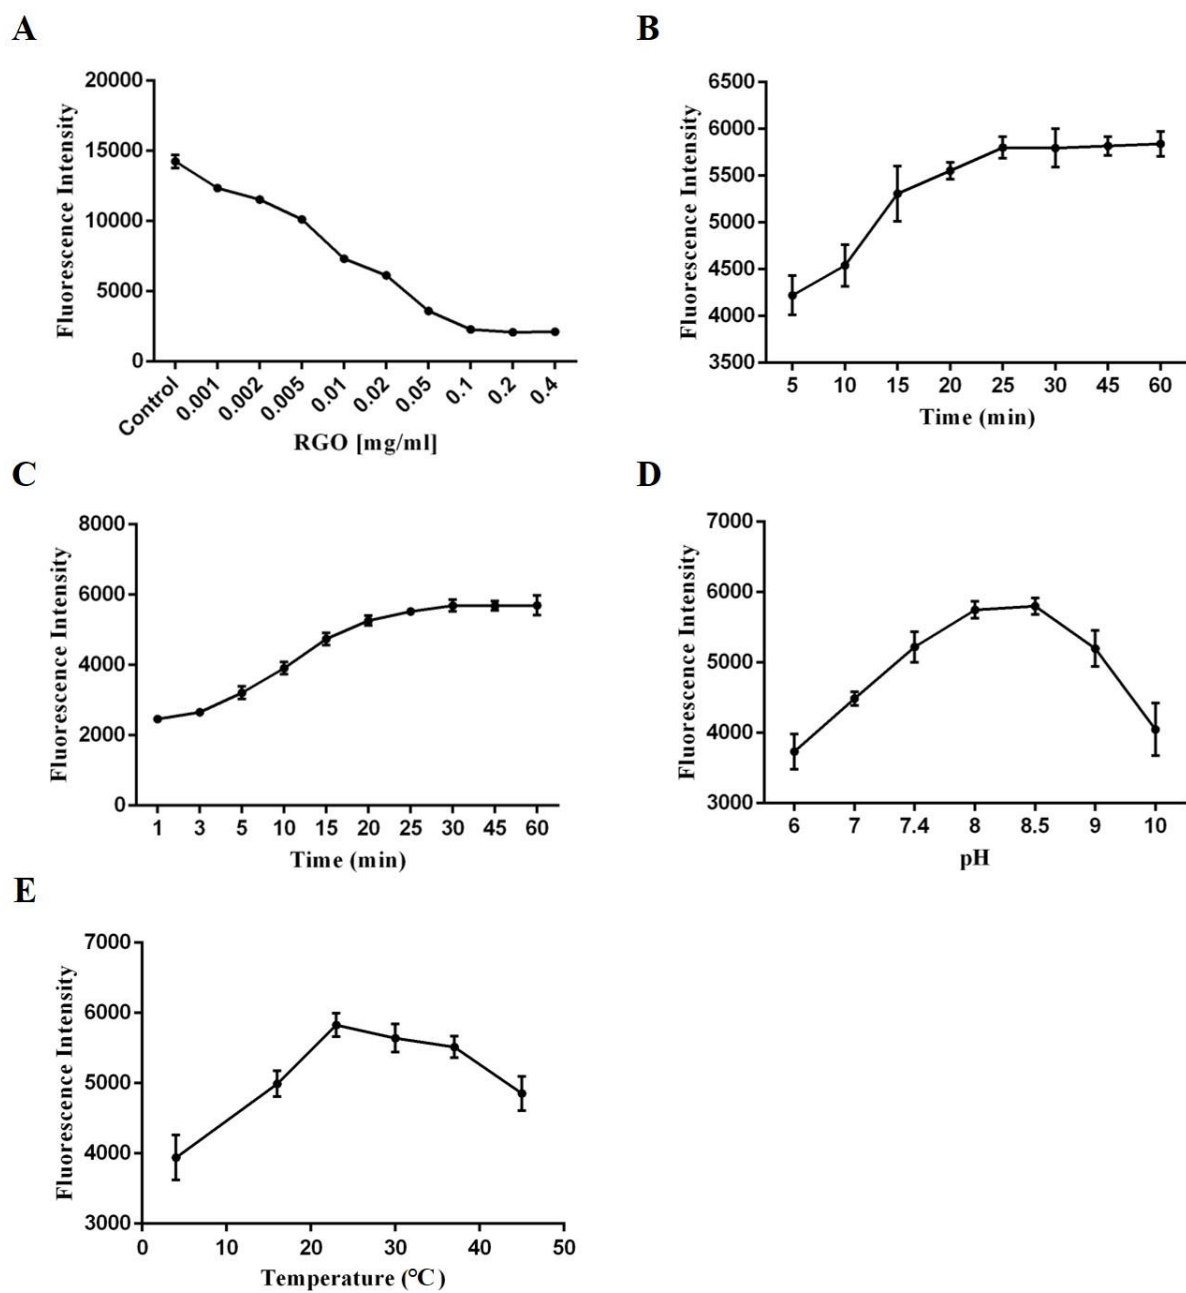

32

33 **Figure S3.** Optimization of the experimental conditions for the RGO-based fluorescent  
 34 aptasensor for kanamycin. (A) RGO concentration, (B) incubation time of RGO, (C) reaction  
 35 time of kanamycin and KBA, (D) reaction pH, and (E) reaction temperature.

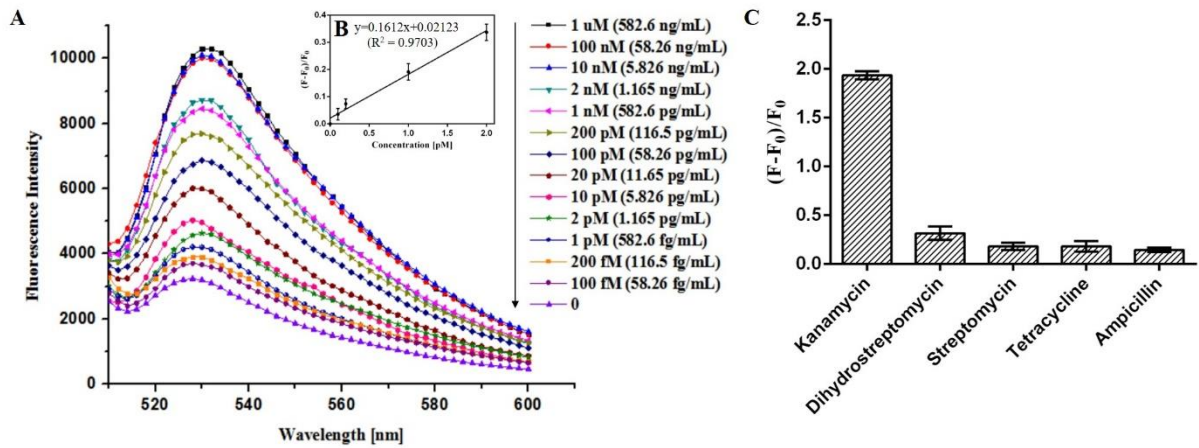

36

37 **Figure S4.** Analytical performance of the RGO-based fluorescent aptasensor for kanamycin  
38 using KBA 2. (A) Fluorescence spectra in the presence of 100 nM of FAM-labeled KBA 2 and  
39 0.1 mg/mL of RGO in 1X PBS (pH 8.5) containing various concentrations of kanamycin (100  
40 fM – 1  $\mu$ M). (B) Peak fluorescence change is linear with kanamycin concentration over the  
41 range from 0.1 to 2 pM. (C) Selectivity of the RGO-based fluorescent aptasensor was measured  
42 at the same concentration of various antibiotics (1  $\mu$ M).

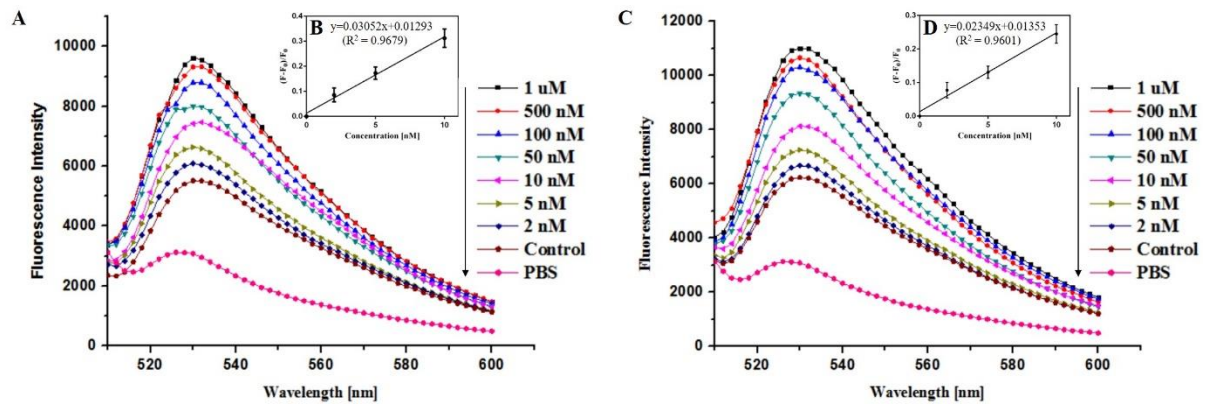

43

44 **Figure S5.** Detection of kanamycin in blood serum samples (bovine and rabbit serum) using  
 45 the RGO-based fluorescent aptasensor system using KBA 2. Fluorescence spectra in the  
 46 presence of 100 nM FAM-labeled KBA 2 and 0.1 mg/mL of RGO in (A) bovine serum (BS)  
 47 and (C) rabbit serum (RS) containing various concentrations of kanamycin (2 nM – 1  $\mu$ M). (B,  
 48 D) Peak fluorescence change is linear with kanamycin concentration over the range from 2 to  
 49 10 nM.

50 **Supplementary Tables**51 **Table S1**

52 SELEX conditions used in each round.

| <b>Round</b>          | <b>Buffers</b>         |                     |                                  | <b>NaCl<br/>[mM]</b>       | <b>Target<br/>[mM]</b>   | <b>ssDNA<br/>(pmole/well)</b> | <b>Incubation<br/>(min)</b> |
|-----------------------|------------------------|---------------------|----------------------------------|----------------------------|--------------------------|-------------------------------|-----------------------------|
|                       | <b>Tris<br/>[mM]</b>   | <b>KCl<br/>[mM]</b> | <b>MgCl<sub>2</sub><br/>[mM]</b> |                            |                          |                               |                             |
| <b>1<sup>st</sup></b> | <b>20<br/>(pH 8.0)</b> | <b>5</b>            | <b>5</b>                         | <b>50</b>                  | <b>Kanamycin<br/>0.5</b> | <b>50</b>                     | <b>90</b>                   |
| <b>2<sup>nd</sup></b> |                        |                     |                                  | <b>100</b>                 |                          |                               |                             |
| <b>3<sup>nd</sup></b> |                        |                     |                                  | <b>150</b>                 |                          |                               |                             |
| <b>4<sup>th</sup></b> |                        |                     |                                  | <b>200</b>                 |                          |                               |                             |
| <b>5<sup>th</sup></b> |                        |                     |                                  | <b>250</b>                 |                          |                               |                             |
| <b>6<sup>th</sup></b> |                        |                     |                                  | <b>Tris<br/>1000</b>       |                          |                               |                             |
| <b>7<sup>th</sup></b> |                        |                     |                                  | <b>Tetracycline<br/>10</b> |                          |                               |                             |
| <b>8<sup>th</sup></b> |                        |                     |                                  | <b>300</b>                 |                          |                               |                             |
| <b>9<sup>th</sup></b> |                        |                     |                                  | <b>400</b>                 |                          |                               |                             |

53

54

55 **Table S2**

56 Sequence information of KBAs, derivatives, and their binding affinities.

| No.     | Aptamer sequences <sup>a</sup>                                                   | Binding affinity <sup>b</sup><br>( $K_d^{app}$ , nM) |
|---------|----------------------------------------------------------------------------------|------------------------------------------------------|
| KBA 1   | ATGCGGATCCCGCGCC <b>GACGTCAGAGAGGC</b><br><b>GCGCTGGTTTGCACC</b> GCGCGAAGCTTGCGC | 268 ± 20.8                                           |
| KBA 1-1 | ATGCGGATCCCGCGCC <b>GACGTCAGAGAGGC</b><br><b>GCGCTGGTTTGCAC</b>                  | 268 ± 26.7                                           |
| KBA 1-2 | <b>CGCGCCGACGTCAGAGAGGCGCG</b>                                                   | 669 ± 10.7                                           |
| KBA 2   | ATGCGGATCCCGCGCG <b>ACCAACGGAAGCGC</b><br><b>GCCACCCCATCGGCGGCGCGAAGCTTGCGC</b>  | 34.7 ± 35.6                                          |
| KBA 2-1 | <b>CGGAAGCGCGCCACCCCATCGGCGGCGCG</b><br>AAGCTTGCG                                | 182 ± 57.2                                           |
| KBA 2-2 | <b>CGCCACCCCATCGGCGGCG</b>                                                       | 564 ± 92.5                                           |
| KBA 3   | ATGCGGATCCCGCGC <b>ACCAACGGAAGCGCG</b><br><b>CCACCCCATCGGCGGGCGCGAAGCTTGCGC</b>  | 341 ± 12.8                                           |
| KBA 3-1 | <b>CGGAAGCGCGCCACCCCATCGGCGGGCGCG</b><br>GAAGCTTGCG                              | 92.3 ± 29.1                                          |
| KBA 3-2 | <b>CGCCACCCCATCGGCGGGCG</b>                                                      | 239 ± 52.5                                           |

57 <sup>a</sup>Total 60mer ssDNA aptamer including 30mer random nucleotides were selected, and their  
58 sequences were determined. The bold sequence indicates the random nucleotides.

59 <sup>b</sup>Binding affinities were determined as described in the Materials and Methods. The  
60 dissociation constant ( $K_d^{app}$ ) was obtained from binding saturation curve fitting from three  
61 independent experiments using the Origin Pro 8 program.
